# Validating and Improving Interrill Erosion Equations

Feng-Bao Zhang<sup>1,2</sup>, Zhan-Li Wang<sup>1,2\*</sup>, Ming-Yi Yang<sup>1,2</sup>

<sup>1</sup> State Key Laboratory of Soil Erosion and Dryland Farming on the Loess Plateau, Institute of Soil and Water Conservation, Northwest A&F University, Yangling, P. R. China,

<sup>2</sup> Institute of Soil and Water Conservation, Chinese Academy of Science and Ministry of Water Resources, Yangling, P. R. China

## Abstract

Existing interrill erosion equations based on mini-plot experiments have largely ignored the effects of slope length and plot size on interrill erosion rate. This paper describes a series of simulated rainfall experiments which were conducted according to a randomized factorial design for five slope lengths (0.4, 0.8, 1.2, 1.6, and 2 m) at a width of 0.4 m, five slope gradients (17%, 27%, 36%, 47%, and 58%), and five rainfall intensities (48, 62.4, 102, 149, and 170 mm h<sup>-1</sup>) to perform a systematic validation of existing interrill erosion equations based on mini-plots. The results indicated that the existing interrill erosion equations do not adequately describe the relationships between interrill erosion rate and its influencing factors with increasing slope length and rainfall intensity. Univariate analysis of variance showed that runoff rate, rainfall intensity, slope gradient, and slope length had significant effects on interrill erosion rate and that their interactions were significant at  $p = 0.01$ . An improved interrill erosion equation was constructed by analyzing the relationships of sediment concentration with rainfall intensity, slope length, and slope gradient. In the improved interrill erosion equation, the runoff rate and slope factor are the same as in the interrill erosion equation in the Water Erosion Prediction Project (WEPP), with the weight of rainfall intensity adjusted by an exponent of 0.22 and a slope length term added with an exponent of  $-0.25$ . Using experimental data from WEPP cropland soil field interrill erodibility experiments, it has been shown that the improved interrill erosion equation describes the relationship between interrill erosion rate and runoff rate, rainfall intensity, slope gradient, and slope length reasonably well and better than existing interrill erosion equations.

**Citation:** Zhang F-B, Wang Z-L, Yang M-Y (2014) Validating and Improving Interrill Erosion Equations. PLoS ONE 9(2): e88275. doi:10.1371/journal.pone.0088275

**Editor:** Juan A. Añel, University of Oxford, United Kingdom

**Received:** June 4, 2013; **Accepted:** January 10, 2014; **Published:** February 6, 2014

**Copyright:** © 2014 Zhang et al. This is an open-access article distributed under the terms of the Creative Commons Attribution License, which permits unrestricted use, distribution, and reproduction in any medium, provided the original author and source are credited.

**Funding:** Financial support for this research was provided by the National Natural Science Foundation of China (41171227, 40901127, 40971172), Natural Science Foundation of Shanxi Province (S2012JC6612), and the special funds of Northwest A&F University for the operational costs of basic scientific research (QN2011072). The funders had no role in study design, data collection and analysis, decision to publish, or preparation of the manuscript.

**Competing Interests:** The authors have declared that no competing interests exist.

\* E-mail: zwang@ms.iswc.ac.cn

## Introduction

Soil erosion on a hill slope consists of two major components: interrill and rill erosion [1]. Interrill erosion is the detachment and transport of soil material from the surface of the soil matrix by raindrop impact and overland flow [2]. More recent process-based models, e.g., WEPP [3], EUROSEM [4], LISEM [5], and PSEM-2D [6], make an explicit distinction between rill and interrill erosion processes and estimate interrill erosion rate using a function of various factors, including interrill erodibility parameter which expresses the soil's resistance to interrill erosion within interrill areas, rainfall erosivity, slope characteristics, hydraulic factors, vegetation, and land use [4–10].

It is difficult to describe and quantify interrill and rill erosion processes simultaneously during a rainfall event, especially to measure the rate of interrill erosion because it is less visible. The mini-plot, which eliminates the effect of rill erosion, has been an important means to study interrill erosion and to establish interrill erosion equations. The effects of rainfall intensity, slope length, slope gradient, runoff rate, and soil type on interrill erosion rate have been described. Power functions were used to describe the effect of rainfall intensity on interrill erosion. The rainfall intensity exponent varied from 1.6 to 2.3 [11] and from 1.36 to 2.54 [12]. The exponent decreased as the clay content of the soil increased [11]. Therefore, interrill erosion rate has been shown to be approximately proportional to the square of the rainfall intensity for a given mini-plot if runoff is not considered [12–15]. To

describe the effect of slope gradient on interrill erosion, several formulas of slope factors have been proposed [16–19]. The role of runoff was initially considered as sediment transport for interrill erosion [20] and was not included in interrill erosion equations [3], but some researchers found that model predictability was improved when a separate runoff parameter was included in interrill erosion equations [21,22]. In general, interrill erosion rate increased gradually with increasing runoff. For the effect of slope length on interrill erosion, there have been inconsistent results, which will be described detailedly in the following discussion.

According to the relationships between interrill erosion rate and its influencing factors, interrill erosion equations have been proposed on the basis of results from mini-plot experiments. In the WEPP model, the following equation was first used to estimate interrill erosion rates [3]:

$$D_i = K_i I^2 S_f \quad (1)$$

where  $D_i$  is interrill erosion rate ( $\text{kg m}^{-2} \text{s}^{-1}$ ),  $K_i$  is interrill erodibility,  $I$  is rainfall intensity ( $\text{m s}^{-1}$ ), and  $S_f$  is slope factor that can be calculated using the following equation [16]:

$$S_f = 1.05 - 0.85 \exp(-4 \sin \theta) \quad (2)$$

where  $\theta$  is the slope gradient ( $^\circ$ ).

As described above, previous studies have shown that model predictability was improved when a separate runoff parameter was included in interrill erosion equations [21,22]. Therefore, Eq. (1) was modified by adding the factor of overland flow [22] and was then used in the WEPP model in 1995 as the following formula [23]:

$$D_i = K_i R I S_f \tag{3}$$

where  $R$  is runoff rate ( $m\ s^{-1}$ ). In addition, to describe interrill erosion processes more accurately and to develop a simple lumped parameter model, the following equation was proposed by analyzing simulated rainfall data [19]:

$$D_i = K_i q^{1/2} I S^{2/3} = K_i R^{1/2} I S^{2/3} L^{1/2} \tag{4}$$

where  $q$  is flow discharge per unit width ( $m^2\ s^{-1}$ ) and  $S$  is slope inclination ( $m\ m^{-1}$ ). This equation thought that the rainfall intensity term,  $I$ , represented the detachment of soil by raindrop impacts and the enhancement of the transport capacity of overland flow and that the term  $q^{1/2} S^{2/3}$  represented sediment transport by thin overland flow. Compared to Eq. (3), the effect of

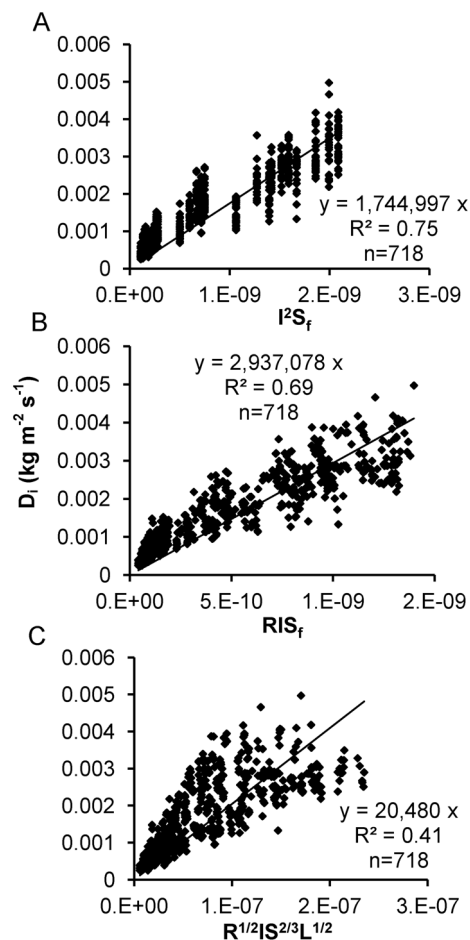

**Figure 1. Linear regressions with zero intercept.** Using linear regression with zero intercept between interrill erosion rate and the scaling factors  $I^2 S_f$  (A),  $R I S_f$  (B), and  $R^{1/2} I S^{2/3} L^{1/2}$  (C) to assess the previous interrill equations based on the mini plots. doi:10.1371/journal.pone.0088275.g001

**Table 1. Interrill erodibilities ( $K_i$ ) and coefficients of determination ( $R^2$ ) for Eqs (1), (3) and (4) for different slope lengths.**

| L (m) |       | Eq (1)    | Eq (3)    | Eq (4) |
|-------|-------|-----------|-----------|--------|
| 0.4   | $K_i$ | 1,773,995 | 3,734,418 | 43,430 |
|       | $R^2$ | 0.90      | 0.90      | 0.96   |
| 0.8   | $K_i$ | 2,026,011 | 3,420,684 | 31,387 |
|       | $R^2$ | 0.77      | 0.78      | 0.88   |
| 1.2   | $K_i$ | 1,815,288 | 2,927,228 | 22,287 |
|       | $R^2$ | 0.79      | 0.80      | 0.84   |
| 1.6   | $K_i$ | 1,531,958 | 2,435,898 | 16,294 |
|       | $R^2$ | 0.71      | 0.70      | 0.82   |
| 2.0   | $K_i$ | 1,571,555 | 2,437,679 | 15,029 |
|       | $R^2$ | 0.64      | 0.64      | 0.77   |
| Mean  | $K_i$ | 1,743,761 | 2,991,181 | 25,686 |
| CV    |       | 11%       | 19%       | 46%    |

doi:10.1371/journal.pone.0088275.t001

runoff on interrill erosion rate was weakened, and the positive effect of slope length on interrill erosion rate was added to Eq. (4).

Parameters for soil type ( $K_i$ ), slope gradient, rainfall intensity, and overland flow are included in Eqs. (1), (3), and (4). The parameter for slope length is included only in Eq. (4). However, inconsistent results have been reported for the effect of slope length on interrill erosion. Running the similar experiments which simulated slope length using inflow rates, some experiments indicated consistently greater interrill erosion from increased overland flow [24], but other experiments showed that greater discharge rates resulted in decreased soil loss [25,26]. The authors thought that interrill erosion at a particular downslope distance is dictated by the soil detachment or sediment transport capacity characteristics existing at that particular location [25,26]. The effects of row-sideslope length within a range of 0.15 m to 0.6 m on sideslope erosion for four soils at several rain intensities demonstrated that slope length affected erosion very little until the soils began to rill, but had a major effect once rilling occurred [27]. However, the inconsistent viewpoint, which was that the effect of slope length on interrill erosion might have been due to a change from erosion which is dominated by raindrop-induced flow transport (RIFT) to erosion which is dominated by raindrop detachment-flow transport (RD-FT) except for the effect of slope length on rilling, was concluded by using the same data [28]. Other experiments indicated that soil losses were significantly correlated with rainfall intensity ( $r = 0.89$ ;  $P < 0.001$ ) and slope length ( $r = 0.43$ ;  $P < 0.001$ ), and suggested that careless scale transfer of erosion data may lead to erroneous conclusions [29]. In addition, some researchers have attributed the effect of slope length on interrill erosion to rainfall intensity and soil properties [27,30] and have assumed that slope length has little or no effect on interrill erosion per unit of area [31,32]. In short, although numerous studies were reported, the effect of slope length on interrill erosion has not been clearly established.

In addition, Eqs. (1), (3), and (4) were developed for smaller plot sizes (less than  $0.5\ m^2$ ), shorter slope lengths (less than 0.8 m), and small slope gradients, and the different researchers who developed these equations used different plot sizes and slope lengths [3,19,22,27]. They suggested that the applicability of their model to longer slopes required further testing [19]. To date, no

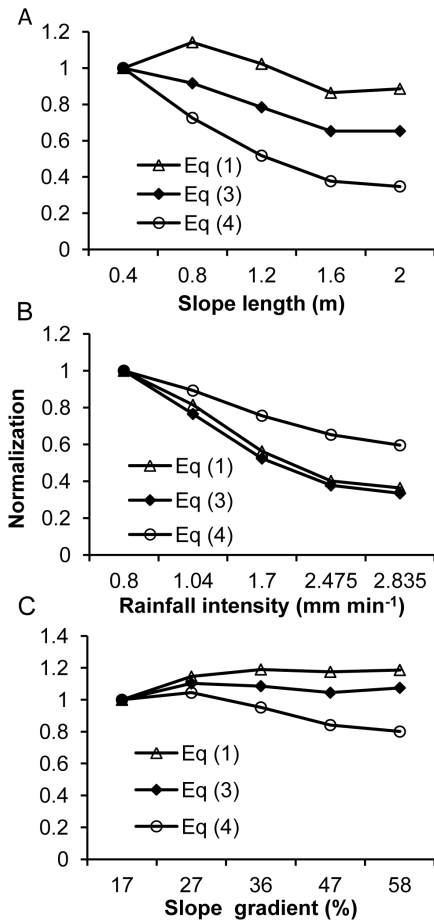

**Figure 2. Normalized interrill erodibilities.** Variations in interrill erodibility for the three equations for different slope lengths (A), rainfall intensities (B), and slope gradients (C), normalized to the lowest values of the independent factors.  
doi:10.1371/journal.pone.0088275.g002

systematic experiments based on mini-plot experiments have been conducted to validate and compare the existing interrill erosion equations for different slope lengths or plot sizes and a wider range of slope gradients and rainfall intensities. The objective of the present study is to validate the existing interrill erosion equations under different controlled experimental conditions and to describe interrill erosion rate accurately by adding or adjusting factors in the interrill erosion equations.

**Materials and Methods**

Erosion tests were conducted at the State Key Laboratory of Soil Erosion and Dryland Farming on the Loess Plateau in Yangling, China. Artificial rainfall was produced using a rain-making machine with an effective rainfall area of 2 m × 3 m at a height of 8.67 m, which produced a simulated rainstorm at a controllable intensity with distribution uniformity greater than 85% and a median raindrop diameter of 2.2 mm, comparable to natural rainfall.

The soil used in the tests was cultivated Huangmian soil (Calcaric Cambisols, FAO) from Ansai County in Shaanxi Province, located in the northern part of the Loess Plateau. The cultivated land sampled in this study is publicly owned and managed by the Ansai Research Station of Soil and Water Conservation, Chinese Academy of Science. No specific permits

**Table 2. Interrill erodibilities ( $K_i$ ) and coefficients of determination ( $R^2$ ) for Eqs. (1), (3), and (4) for different rainfall intensities.**

| I (mm min <sup>-1</sup> ) |       | Eq (1)    | Eq (3)    | Eq (4)         |
|---------------------------|-------|-----------|-----------|----------------|
| 0.8                       | $K_i$ | 4,386,185 | 7,967,808 | 29,897         |
|                           | $R^2$ | 0.26      | 0.49      | 0 <sup>a</sup> |
| 1.04                      | $K_i$ | 3,572,441 | 6,097,944 | 27,063         |
|                           | $R^2$ | 0.39      | 0.45      | 0              |
| 1.7                       | $K_i$ | 2,465,436 | 4,171,479 | 23,615         |
|                           | $R^2$ | 0.4       | 0.37      | 0              |
| 2.475                     | $K_i$ | 1,761,220 | 3,009,673 | 20,424         |
|                           | $R^2$ | 0.6       | 0.39      | 0              |
| 2.835                     | $K_i$ | 1,596,803 | 2,662,866 | 19,345         |
|                           | $R^2$ | 0.46      | 0.17      | 0              |
| Mean                      | $K_i$ | 2,756,417 | 4,781,954 | 24,069         |
| CV                        |       | 43%       | 47%       | 18%            |

<sup>a</sup> $R^2$  was negative for the linear regression with zero intercept between interrill erosion rate and  $lq^{1/2}S^{2/3}$  in Eq (4); therefore, it was replaced by zero.  
doi:10.1371/journal.pone.0088275.t002

were required for the field studies described. The soil contained 38.72% sand, 45.59% silt, 15.69% clay, and 0.53% organic matter. The soil was collected from the top 0.25 m layer in cultivated land, air-dried, crushed to pass through a 4-mm sieve, and thoroughly mixed. The soil moisture content was held constant at 14% for all experiments.

Perforated metal flumes with different lengths (0.4, 0.8, 1.2, 1.6, and 2 m), 0.4 m in width and 0.25 m in depth, were manufactured for use in the tests. The slope gradient of each flume could easily be adjusted from 0% to 84%. A trough was placed at the lower edge of the flume to collect runoff and sediment samples. The soil was packed uniformly into the flumes in four 5.5-cm layers to a total depth of 22 cm with a bulk density of 1.3 g cm<sup>-3</sup>. To reduce discontinuities between layers, the surface of each soil

**Table 3. Interrill erodibilities ( $K_i$ ) and coefficients of determination ( $R^2$ ) for Eqs. (1), (3), and (4) for different slope gradients.**

| S (%) |       | Eq (1)    | Eq (3)    | Eq (4) |
|-------|-------|-----------|-----------|--------|
| 17    | $K_i$ | 1,503,203 | 2,753,304 | 23,327 |
|       | $R^2$ | 0.71      | 0.7       | 0.47   |
| 27    | $K_i$ | 1,722,260 | 3,036,752 | 23,789 |
|       | $R^2$ | 0.74      | 0.68      | 0.44   |
| 36    | $K_i$ | 1,788,967 | 2,989,530 | 21,976 |
|       | $R^2$ | 0.72      | 0.65      | 0.37   |
| 47    | $K_i$ | 1,766,816 | 2,875,945 | 19,512 |
|       | $R^2$ | 0.71      | 0.64      | 0.34   |
| 58    | $K_i$ | 1,784,369 | 2,958,936 | 18,592 |
|       | $R^2$ | 0.75      | 0.67      | 0.34   |
| Mean  | $K_i$ | 1,713,123 | 2,922,893 | 21,439 |
| CV    |       | 7%        | 4%        | 11%    |

doi:10.1371/journal.pone.0088275.t003

**Table 4.** Univariate Analysis of Variance for selected parameters with interrill erosion rate as a dependent variable using all effective steady-state values.

| Source             | Type III Sum of Squares | df  | Mean Square | F Value | Sig. |
|--------------------|-------------------------|-----|-------------|---------|------|
| Corrected Model    | .001 <sup>a</sup>       | 125 | 5.405E-06   | 115.591 | .000 |
| Intercept          | 2.797E-06               | 1   | 2.797E-06   | 59.824  | .000 |
| Runoff (R)         | 2.747E-07               | 1   | 2.747E-07   | 5.874   | .016 |
| Intensity (I)      | 3.518E-06               | 4   | 8.794E-07   | 18.808  | .000 |
| Slope length (L)   | 1.939E-05               | 4   | 4.847E-06   | 103.660 | .000 |
| Slope gradient (S) | 3.017E-05               | 4   | 7.542E-06   | 161.305 | .000 |
| I * L              | 1.104E-05               | 16  | 6.901E-07   | 14.760  | .000 |
| I * S              | 1.507E-05               | 16  | 9.419E-07   | 20.144  | .000 |
| L * S              | 8.892E-06               | 16  | 5.558E-07   | 11.886  | .000 |
| I * L * S          | 8.576E-06               | 64  | 1.340E-07   | 2.866   | .000 |
| Error              | 2.768E-05               | 592 | 4.676E-08   |         |      |
| Total              | .003                    | 718 |             |         |      |
| Corrected Total    | .001                    | 717 |             |         |      |

<sup>a</sup>R<sup>2</sup> = 0.961 (Adjusted R<sup>2</sup> = 0.952).

doi:10.1371/journal.pone.0088275.t004

layer was gently scored. The surface of the top layer was smoothed to minimize microtopographic effects.

Two replications of all combinations of one soil type, five levels of slope length (0.4, 0.8, 1.2, 1.6, and 2 m), five levels of slope gradient (17%, 27%, 36%, 47%, and 58%), and five levels of rainfall intensity (48, 62.4, 102, 149, and 170 mm h<sup>-1</sup>) were tested using a randomized factorial design. A total of 250 runs were conducted. Replicate means were used in the data analyses.

Simulated rainfall was generally applied for 60 min for each rainfall event and was terminated if rill erosion occurred during the 60 min. Sediment and runoff samples were collected continuously throughout the rainfall event. Samples were collected at 1, 2, 3, 4, and 5 min within the first 15 minutes after runoff production and then every 5 min thereafter. Sediment and runoff were measured gravimetrically. In general, steady states of soil loss and runoff rate were reached within 30 min after runoff commenced. To minimize the effect of surface condition, steady-state values were used in the analysis [3,19,27]. Values identified as outliers were not included [3]. In total, 36 of 1740 experimental values and 22 of 740 steady-state values were rejected. Statistical analyses were performed using the SPSS PASW Statistics (Version 18.0) software.

## Results and Discussion

### Validation of existing interrill erosion equations

Interrill erodibility based on mini-plot experiments for a given soil type was defined as a constant for each equation. This constant was determined from linear regression between the interrill erosion rate  $D_i$  and the scaling factors  $F^2 S_f$  in Eq. (1),  $RIS_f$  in Eq. (3), and  $IR^{1/2} S^{2/3} L^{1/2}$  in Eq. (4) for all effective steady-state values. A zero intercept was used in the regression, and the slope of the regression line was assumed to be the interrill erodibility ( $K_i$ ). Figure 1 presents the results of linear regression with zero intercept for Eqs. (1), (3), and (4). Good linear regressions could not be gained for the three interrill erosion equations for all effective steady-state values, which indicated that in some cases the existing interrill erosion

equations did not adequately describe the relationship between interrill erosion rate and its influencing factors.

To find further key factors influencing the equation's predictive power, interrill erodibility was also calculated using linear regression with a zero intercept under various controlled experimental conditions. Table 1 presents interrill erodibility ( $K_i$ ) and coefficient of determination ( $R^2$ ) for different slope lengths for the three existing equations. When rainfall intensity and slope gradient were varied and slope length was increased from 0.4 m to 2 m, the interrill erodibility ( $K_i$ ) from Eq. (1) varied slightly, with a coefficient of variation (CV) of 11%, whereas that from Eq. (3) decreased by approximately 1.5 times, with a CV of 19%, and that from Eq. (4) varied widely and decreased by approximately 2.9 times, with a CV of 46% (Fig. 2a). These results indicated that slope length plays a key role in Eqs. (3) and (4) and should be included in these equations. Compared with Eq. (1), the wide variations in interrill erodibility for Eqs. (3) and (4) might imply interactions between runoff and slope length. The change in the coefficient of determination ( $R^2$ ) corresponding to the change in slope length from 0.4 m to 2 m demonstrated that the three existing interrill equations could describe interrill erosion processes effectively for plots with shorter slope lengths, especially those experiments of approximately 0.4 m. This finding is consistent with existing interrill erosion equations established on the basis of data from mini-plots with shorter slope lengths in previous works [3,12,27].

Table 2 presents the interrill erodibility ( $K_i$ ) values and coefficients of determination ( $R^2$ ) obtained for different rainfall intensities using the three existing equations. Interrill erodibility ( $K_i$ ) for the three equations decreased as rainfall intensity increased from 0.8 to 2.835 mm min<sup>-1</sup> (Fig. 2b). Interrill erodibility ( $K_i$ ) varied obviously for Eqs. (1) and (3), with a CV of approximately 45%, but varied relatively little for Eq. (4), with a CV of 18% because of the decrease in the weight of runoff rate in the equation. These results indicated that the effects of rainfall intensity or runoff rate are overestimated by the three existing interrill erosion equations. When the weight of runoff or rainfall intensity in the interrill erosion equations was decreased, the equations' predictive power was improved. Therefore, an adjustment to these weights should be considered.

Table 3 presents the interrill erodibility ( $K_i$ ) values and coefficients of determination ( $R^2$ ) obtained for different slope gradients for the three existing equations. Only for Eq. (4) did interrill erodibility decrease with an increase in slope gradient (Fig. 2c). In general, interrill erodibility from these three equations varied slightly with slope gradient. These results suggested that the effect of slope gradient on interrill erosion rate is almost completely expressed by the existing equations, but that use of the  $S_f$  term in Eqs. (1) and (3) yields better results than use of the  $S_f^{2/3}$  term in Eq. (4). The lower coefficient of determination ( $R^2$ ) values shown in Tables 2 and 3 also implied that slope length is the most important factor affecting interrill erosion processes and results in lower coefficients of determination ( $R^2$ ).

In summary, the results from the analysis described above suggested that the three existing interrill erosion equations considered do not completely describe the relationship between interrill erosion rate and its influencing factors, especially slope length and rainfall intensity or runoff. In addition, univariate analysis of variance was conducted on the assumption that runoff rate was the covariant and that rainfall intensity, slope gradient, and slope length were the fixed factors. The results of this analysis showed that runoff rate, rainfall intensity, slope gradient, and slope length had significant effects on interrill erosion rate and that their interactions were significant at  $p < 0.01$  (Table 4). These results

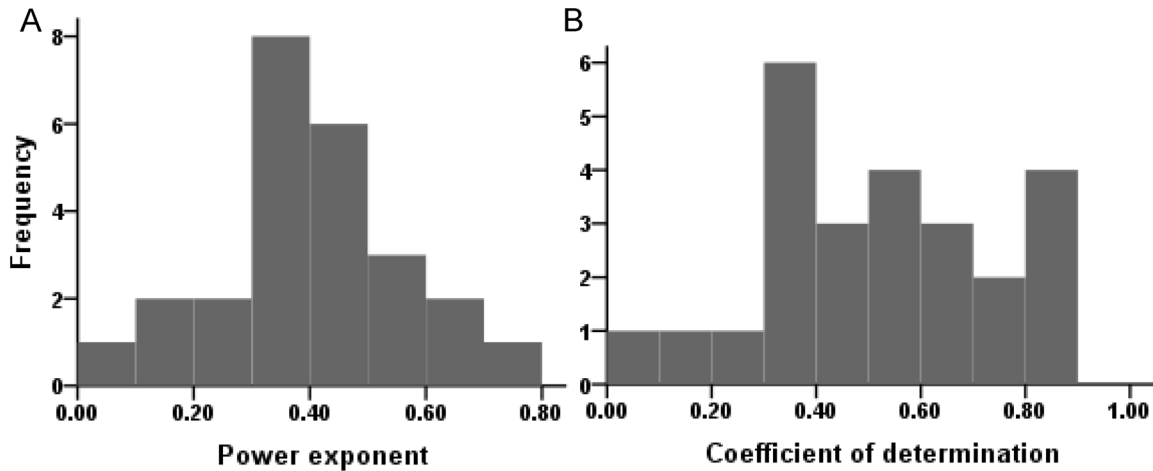

**Figure 3. Regression parameters of power function.** Power exponents (A) and coefficients of determination (B) for the relationship between sediment concentration and slope gradient for all tests. doi:10.1371/journal.pone.0088275.g003

also implied that the effect of slope length on interrill erosion rate should be considered in the interrill erosion equations. Therefore, an interrill erosion equation is needed that includes a factor for slope length and weight adjustments for the other factors.

**Improved interrill erosion equation**

According to Eqs. (1), (3), and (4) and the results of the analysis described above, the interrill erosion rate for a given soil type can be described by a function of the following general form:

$$D_i = f(R, I, S, L) \tag{5}$$

In this function, slope gradient (*S*), rainfall intensity (*I*), and slope length (*L*) are three independent variables that directly affect runoff rate (*R*) and directly or indirectly affect interrill erosion rate (*D<sub>i</sub>*). Runoff rate also affects interrill erosion rate. In fact, these factors are interdependent and interactive. Multivariate regression does obtain the best-fit expression, but does not reflect the physical

interpretation of the interaction between interrill erosion rate and its influencing factors. It is difficult to eliminate the interdependence and interaction among these factors and to express accurately the relationship between interrill erosion rate and its influencing factors using multivariate regression. Therefore, before structuring the interrill erosion equation, it is necessary to analyze individually the relationships between interrill erosion rate and each influencing factor and to understand their physical interpretation under controlled conditions.

Sediment concentration (*C*) is a composite indicator whose variations reflect the dynamic variations of runoff and soil loss. Transport by interrill overland flow is the predominant process in interrill erosion [2], and the detachment process can be considered negligible [20]. Based on the theory of erosion by rainfall-disturbed flow [33,34], sediment concentration was determined by soil factors, rainfall intensity, kinetic energy per unit quantity of rain, slope length, and slope gradient [28]. Because the kinetic energy of rain is an expression of rainfall intensity [35], the sediment concentration for a given soil type can also be expressed by a function of the following general form:

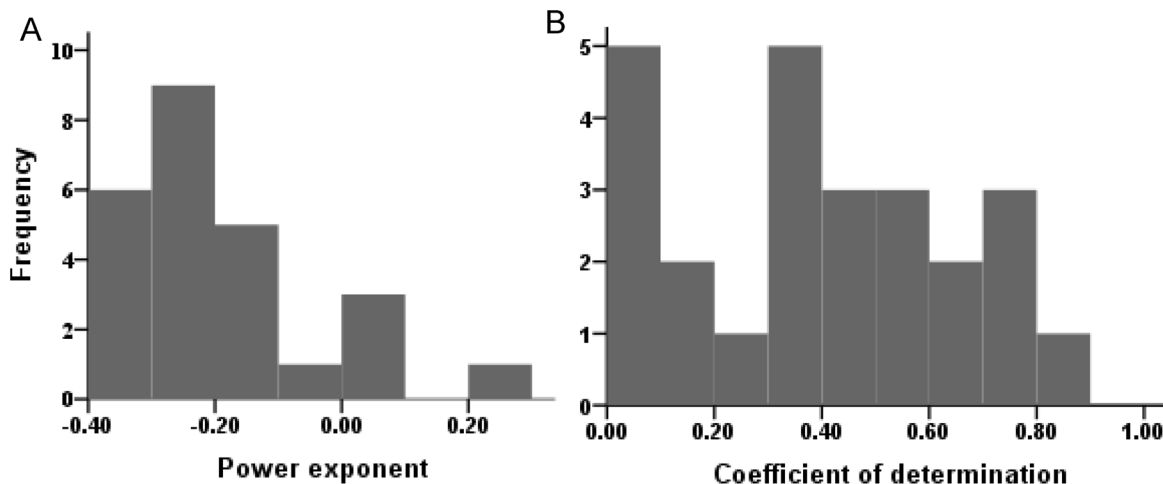

**Figure 4. Regression parameters of power function.** Power exponents (A) and coefficients of determination (B) for the relationship between sediment concentration and slope length for all tests. doi:10.1371/journal.pone.0088275.g004

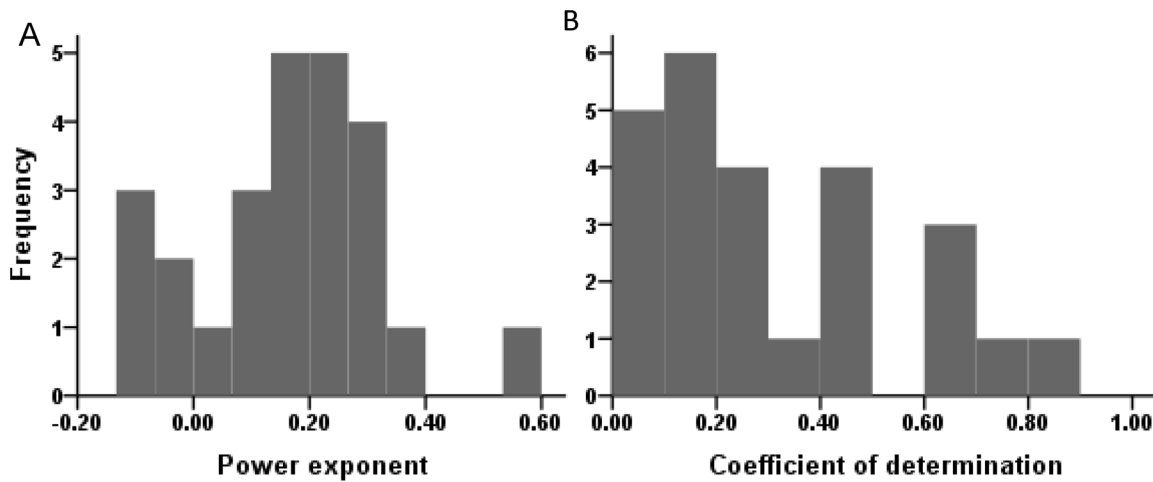

**Figure 5. Regression parameters of power function.** Power exponents (A) and coefficients of determination (B) for the relationship between sediment concentration and rainfall intensity for all tests. doi:10.1371/journal.pone.0088275.g005

$$C = f(I, S, L) \tag{6}$$

Compared with Eq. (5), there is one dependent parameter ( $C$ ) in Eq. (6), and the effects of the interdependence between runoff rate and rainfall intensity, slope gradient, and slope length in Eq. (5) are not considered in Eq. (6), while interactions among rainfall intensity, slope gradient, and slope length may exist in Eq. (6).

Sediment concentration ( $C$ ) can also be calculated by the following formula:

$$C = D_i / R \tag{7}$$

Therefore, if the relationships between sediment concentration and slope gradient, rainfall intensity, and slope length can be determined, the relationships between interrill erosion rate and runoff rate, slope gradient, rainfall intensity, and slope length can also be determined. The relationships between sediment concentrations and each influencing factor are quantified in the following discussion.

For the same slope length and rainfall intensity, highly significant power-function relationships ( $p < 0.05$ ) between sediment concentration and slope gradient were found except for one combination test, although the power exponents were different for different combinations of slope length and rainfall intensity (Fig. 3). In general, the change in sediment concentration was less than linearly related to the change in slope gradient, with a mean power exponent of 0.4 and a CV of 0.41. The power exponents and the coefficients of determination ( $R^2$ ) decreased with increasing slope length. This suggested that the effect of slope gradient on sediment concentration decreases with increasing slope length. The variability of the power exponent was less for higher rainfall intensities than for lower rainfall intensities.

For the same slope gradient and rainfall intensity, significant negative power-function relationships ( $p < 0.05$ ) between sediment concentration and slope length were detected in 19 out of 25 combination tests, and one had a negative power-function relationship ( $p > 0.05$ ). Figure 4 presents the frequencies of the power exponents and the coefficients of determination of the relationship between sediment concentration and slope length for all tests. For five combination tests with positive exponents, four tests were insignificant ( $p > 0.05$ ), and one had a significantly positive correlation ( $p < 0.05$ ). The positive power exponents

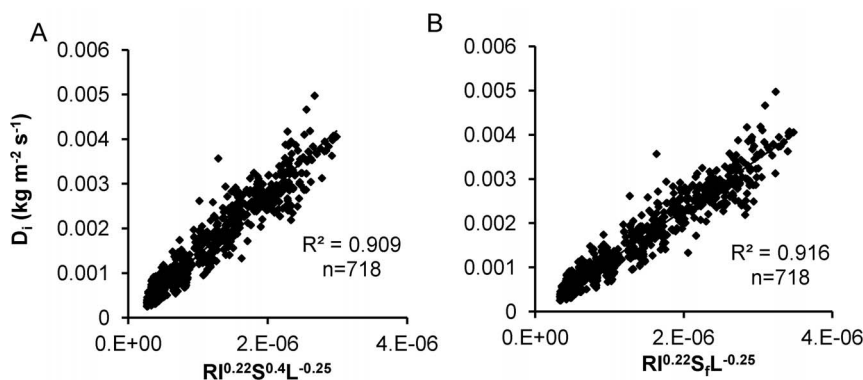

**Figure 6. Linear regressions with zero intercept.** Linear regression with zero intercept between the interrill erosion rate and the scaling factors  $R^{0.22} S^{0.4} L^{-0.25}$  (A) and  $R^{0.22} S_f L^{-0.25}$  (B) to assess the slope factor of  $S^{0.4}$  and  $S_f$ . doi:10.1371/journal.pone.0088275.g006

**Table 5.** Slopes of the linear regression ( $K_i$ ) and coefficients of determination ( $R^2$ ) from Eq (10) for different experimental conditions.

| L (m) | Eq (10) |       | I ( $\text{mm min}^{-1}$ ) | Eq (10) |       | S (%) | Eq (10) |       |
|-------|---------|-------|----------------------------|---------|-------|-------|---------|-------|
|       | $K_i$   | $R^2$ |                            | $K_i$   | $R^2$ |       | $K_i$   | $R^2$ |
| 0.4   | $K_i$   | 1,132 | 0.8                        | $K_i$   | 1,271 | 17    | $K_i$   | 1,082 |
|       | $R^2$   | 0.95  |                            | $R^2$   | 0.5   |       | $R^2$   | 0.86  |
| 0.8   | $K_i$   | 1,234 | 1.04                       | $K_i$   | 1,190 | 27    | $K_i$   | 1,197 |
|       | $R^2$   | 0.95  |                            | $R^2$   | 0.49  |       | $R^2$   | 0.89  |
| 1.2   | $K_i$   | 1,163 | 1.7                        | $K_i$   | 1,192 | 36    | $K_i$   | 1,182 |
|       | $R^2$   | 0.93  |                            | $R^2$   | 0.57  |       | $R^2$   | 0.92  |
| 1.6   | $K_i$   | 1,050 | 2.475                      | $K_i$   | 1,148 | 47    | $K_i$   | 1,134 |
|       | $R^2$   | 0.90  |                            | $R^2$   | 0.72  |       | $R^2$   | 0.9   |
| 2.0   | $K_i$   | 1,153 | 2.835                      | $K_i$   | 1,134 | 58    | $K_i$   | 1,140 |
|       | $R^2$   | 0.86  |                            | $R^2$   | 0.67  |       | $R^2$   | 0.94  |
| Mean  | $K_i$   | 1,146 | Mean                       | $K_i$   | 1,187 | Mean  | $K_i$   | 1,147 |
| CV    |         | 5.7%  | CV                         |         | 4.5%  | CV    |         | 3.9%  |

doi:10.1371/journal.pone.0088275.t005

between sediment concentration and slope length might have resulted from poor control of the experimental conditions or from other random factors. The mean power exponent of the negative correlation was  $-0.25$ , with a CV of 0.33. In general, the power exponents decreased as slope gradient and rainfall intensity increased. The negative correlation between sediment concentration and slope length might indicate that the role of raindrop detachment on detached soil particles from the soil surface weakens with increasing slope length and that transport-limited erosion processes transfer to detachment-limited erosion with increasing slope length.

A power-function relationship between sediment concentration and rainfall intensity was derived for controlled conditions of fixed slope length and gradient. Among the 25 combination tests, 18 were significant positive power-function relationships ( $p < 0.05$ ), 2 were insignificant positive power-function relationships ( $p > 0.05$ ), and 5 were insignificant negative power-function relationships ( $p > 0.05$ ). These results indicate that positive power-function relationships exist between sediment concentration and rainfall intensity, while for a few tests, an insignificant negative correlation was detected, and that the power exponents are different for

different tests (Fig. 5). The mean power exponent of the positive correlations was 0.22, with a CV of 0.55. In general, the power exponents decreased as slope length increased, which indicated that the effect of rainfall intensity on sediment concentration weakens due to the increase of flow depth and the reduction in raindrop detachment with increasing slope length and plot size.

Based on the results of the analysis described above, power-function relationships were derived between sediment concentration ( $C$ ) and slope gradient ( $S$ ), rainfall intensity ( $I$ ), and slope length ( $L$ ) for all combination tests. The averaged power exponents were used as a basis for describing the relationship between  $C$  and  $I$ ,  $S$ , and  $L$  in Eq. (6). As a result, Eq. (6) can be expressed as:

$$C = AI^{0.22}S^{0.4}L^{-0.25} \quad (8)$$

In Eq. (8),  $A$  is a constant for a given soil type and is equivalent to the interrill erodibility ( $K_i$ ) of that soil type.

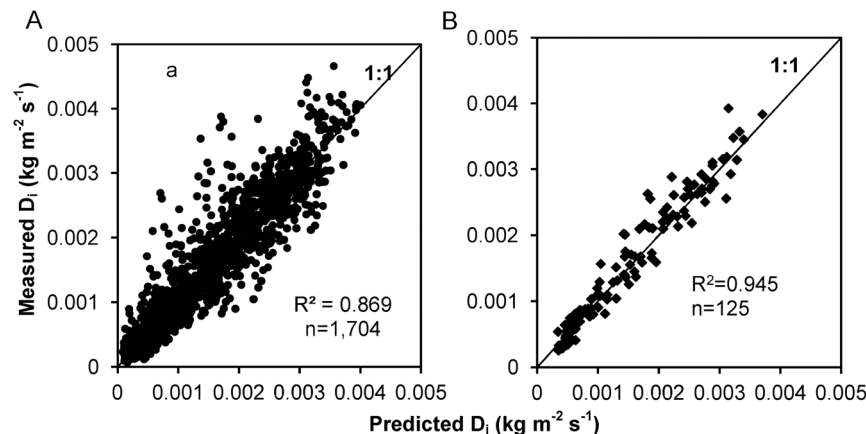**Figure 7.** Measured vs. predicted interrill erosion rates. Measured and predicted interrill erosion rates for Eq. (10) for the erosion processes during a rainfall event (A) and the average of each rainfall event (B).

doi:10.1371/journal.pone.0088275.g007

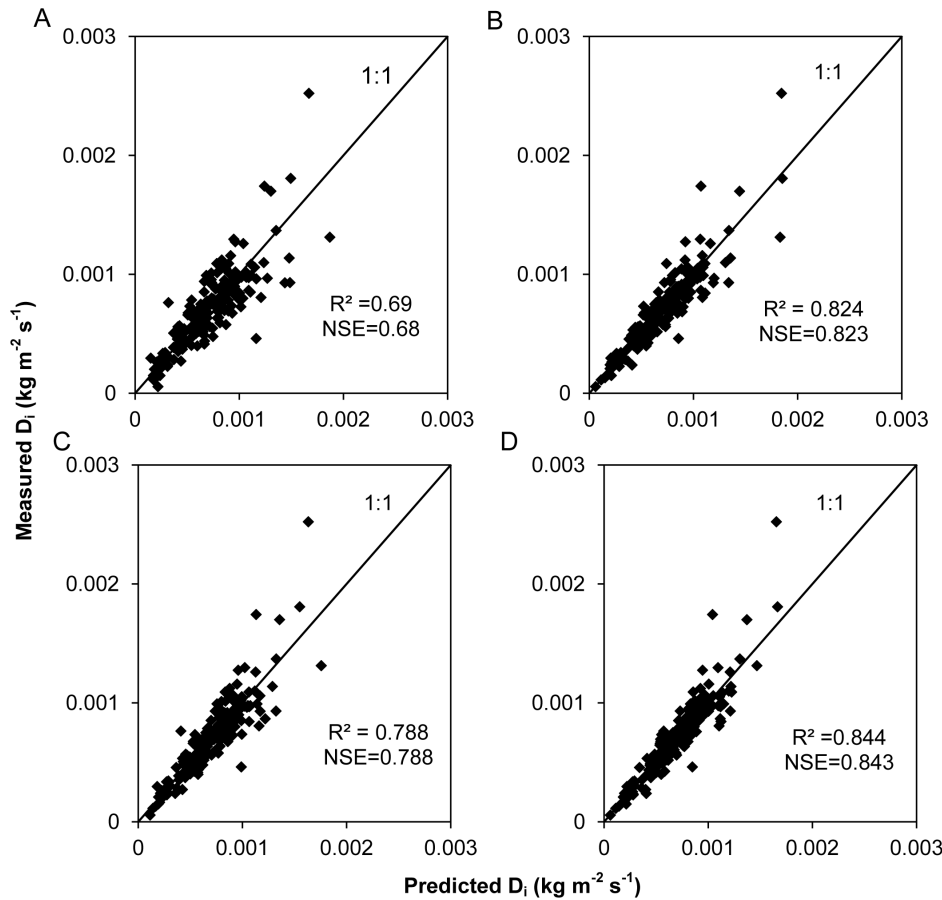

**Figure 8. Measured vs. predicted interrill erosion rates.** Measured and predicted interrill erosion rates for Eq. (1) (A), Eq. (3) (B), Eq. (4) (C), and Eq. (10) (D) using experimental data from WEPP cropland soil field interrill erodibility experiments. doi:10.1371/journal.pone.0088275.g008

Combining Eqs. (7) and (8), the interrill erosion rate,  $D_i$  ( $\text{kg m}^{-2} \text{s}^{-1}$ ), can be expressed by the following equation:

$$D_i = K_i RI^{0.22} S^{0.4} L^{-0.25} \tag{9}$$

However, as the previous work noted [19], the exponents of rainfall intensity, slope gradient, and slope length can be slightly altered to account for interactions among soil type, gradient, slope length, and rainfall intensity.

Figure 6 shows linear regressions with zero intercept between the interrill erosion rate ( $D_i$ ) and the scaling factor  $RI^{0.22} S^{0.4} L^{-0.25}$  and the scaling factor  $RI^{0.22} S_f L^{-0.25}$ . Although the coefficient of determination ( $R^2$ ) values using  $S^{0.4}$  and  $S_f$  were not significantly different, using  $S_f$  to describe the effect of gradient on interrill erosion yielded slightly better results than using  $S^{0.4}$ . Moreover, using  $S_f$  was consistent with results obtained by other researchers [16]. Equation (9) could therefore be transformed as follows:

$$D_i = K_i RI^{0.22} S_f L^{-0.25} \tag{10}$$

To assess the performance of Eq. (10), table 5 presents the linear regression slopes ( $K_i$ ) and coefficients of determination ( $R^2$ ) obtained from linear regressions with zero intercept between the

interrill erosion rate ( $D_i$ ) and the scaling factor  $RI^{0.22} S_f L^{-0.25}$  for different experimental conditions. The higher coefficients of determination ( $R^2$ ) and the lower CVs of interrill erodibility ( $K_i$ ) indicated that Eq. (10) is better than previously developed equations for interrill erosion and adequately predicts interrill erosion for a wide range of rainfall intensities, slope gradients, and slope lengths.

As stated previously, Eq. (10) was developed for steady-state overland flow and interrill erosion rate. Equation (10) must be validated for non-steady-state conditions. Equation (10) was therefore used to predict interrill erosion rates during a rainfall event and the averaged interrill erosion rate of each rainfall event for all rainfall events in this study. The measured and predicted interrill erosion rates are presented in Fig. 7. Correlation coefficients of 0.932 and 0.972 between the measured and predicted interrill erosion rates were obtained, and Nash-Sutcliffe coefficients of 0.865 and 0.942 were obtained for the interrill erosion rates of erosion processes and the average of each rainfall event respectively. These results suggested that Eq. (10) could predict interrill erosion rates reasonably well, despite a few predicted values that were considerably different from the corresponding measured values.

### Validation of the improved interrill erosion equation

To evaluate further the effectiveness of the improved interrill erosion equation, experimental data from WEPP cropland soil field interrill erodibility experiments were used for validation.



**Table 6.** Interrill erodibility and its CV from the different interrill erosion equations for the experimental data from the WEPP cropland soil field interrill erodibility experiments.

| Soil type   | No. of plots | $D_i = K_i R^2 S_f$ |        | $D_i = K_i R I S_f$ |        | $D_i = K_i q^{1/2} I S^{2/3}$ |        | $D_i = K_i R I^{0.22} S_f L^{-0.25}$ |        |
|-------------|--------------|---------------------|--------|---------------------|--------|-------------------------------|--------|--------------------------------------|--------|
|             |              | $K_i$               | CV (%) | $K_i$               | CV (%) | $K_i$                         | CV (%) | $K_i$                                | CV (%) |
| Sharpsburg  | 6            | 1,917,372           | 24.05  | 2,457,363           | 13.22  | 23,850                        | 17.18  | 323                                  | 13.03  |
| Hersh       | 6            | 4,153,649           | 37.64  | 6,801,244           | 31.43  | 58,530                        | 31.28  | 920                                  | 26.69  |
| Keith       | 6            | 3,403,141           | 23.66  | 4,229,851           | 24.27  | 44,048                        | 21.04  | 597                                  | 19.94  |
| Amarillo    | 6            | 4,213,438           | 31.33  | 6,235,421           | 33.63  | 65,118                        | 31.16  | 865                                  | 34.25  |
| Woodward    | 6            | 4,592,143           | 27.85  | 7,568,362           | 20.60  | 74,617                        | 28.95  | 1,049                                | 27.73  |
| Heiden      | 6            | 1,336,998           | 24.65  | 1,638,827           | 30.53  | 17,529                        | 25.49  | 211                                  | 30.66  |
| Whitney     | 6            | 3,101,189           | 20.41  | 4,367,166           | 16.02  | 48,903                        | 18.38  | 590                                  | 14.56  |
| Academy     | 6            | 2,994,017           | 25.59  | 3,932,019           | 11.12  | 40,099                        | 16.97  | 514                                  | 9.04   |
| Los Banos   | 6            | 2,405,840           | 14.00  | 3,262,543           | 17.95  | 30,191                        | 10.92  | 414                                  | 10.58  |
| Portneuf    | 6            | 1,382,542           | 16.90  | 2,314,773           | 14.54  | 20,975                        | 13.61  | 280                                  | 12.42  |
| Nansene     | 6            | 3,206,879           | 22.89  | 4,936,611           | 16.09  | 44,005                        | 15.82  | 682                                  | 11.03  |
| Palouse     | 6            | 4,003,363           | 18.95  | 5,201,600           | 12.97  | 48,338                        | 13.65  | 682                                  | 9.57   |
| Zahl        | 6            | 3,267,617           | 29.70  | 3,840,678           | 20.37  | 42,288                        | 21.38  | 512                                  | 14.65  |
| Pierre      | 6            | 2,300,664           | 17.06  | 2,719,824           | 7.11   | 27,829                        | 11.27  | 367                                  | 6.60   |
| Williams    | 6            | 2,684,238           | 24.36  | 3,548,762           | 11.90  | 38,403                        | 10.74  | 508                                  | 10.17  |
| Barnes - ND | 6            | 1,876,045           | 10.85  | 3,056,669           | 10.09  | 31,502                        | 8.41   | 474                                  | 8.12   |
| Sverdrup    | 6            | 2,362,425           | 17.69  | 3,958,183           | 14.65  | 34,180                        | 13.69  | 533                                  | 14.54  |
| Barnes - MN | 6            | 1,503,947           | 21.63  | 2,576,945           | 20.84  | 24,530                        | 18.80  | 409                                  | 17.40  |
| Mexico      | 6            | 2,970,456           | 16.24  | 4,153,863           | 15.04  | 41,848                        | 13.23  | 570                                  | 12.10  |
| Grenada     | 6            | 2,633,592           | 19.66  | 3,372,939           | 10.67  | 35,349                        | 13.24  | 462                                  | 10.24  |
| Tifton      | 6            | 652,793             | 54.22  | 1,603,183           | 27.15  | 12,053                        | 36.29  | 221                                  | 23.88  |
| Bonifay     | 6            | 871,497             | 73.08  | 4,226,263           | 15.32  | 22,179                        | 47.29  | 581                                  | 21.05  |
| Cecil       | 6            | 1,858,964           | 25.03  | 2,282,079           | 18.68  | 24,807                        | 21.10  | 319                                  | 19.42  |
| Hiwassee    | 6            | 1,873,194           | 18.16  | 2,243,785           | 17.27  | 25,030                        | 15.54  | 320                                  | 13.94  |
| Gaston      | 6            | 2,036,993           | 13.15  | 2,205,358           | 16.98  | 24,961                        | 14.49  | 297                                  | 16.56  |
| Opequon     | 6            | 3,195,673           | 16.05  | 3,398,535           | 9.63   | 39,643                        | 11.97  | 474                                  | 7.20   |
| Frederick   | 6            | 2,477,747           | 29.91  | 3,331,759           | 15.01  | 35,043                        | 21.67  | 476                                  | 14.22  |
| Manor       | 6            | 2,694,182           | 23.21  | 3,563,361           | 12.63  | 38,111                        | 17.67  | 515                                  | 13.31  |
| Caribou     | 6            | 1,551,246           | 11.13  | 1,845,618           | 7.78   | 20,635                        | 8.21   | 263                                  | 7.82   |
| Collamer    | 6            | 3,456,598           | 16.26  | 4,121,058           | 9.61   | 44,942                        | 10.17  | 566                                  | 6.60   |
| Miamian     | 6            | 1,591,767           | 22.99  | 2,284,814           | 18.64  | 22,548                        | 20.61  | 310                                  | 19.44  |
| Lewisburg   | 6            | 2,257,824           | 20.43  | 2,803,097           | 15.93  | 29,807                        | 16.97  | 381                                  | 14.62  |
| Miami       | 6            | 1,970,749           | 26.84  | 2,579,164           | 18.97  | 26,927                        | 20.07  | 356                                  | 15.01  |

doi:10.1371/journal.pone.0088275.t006

These experiments were part of the USDA-ARS WEPP project, which included thirty-three soils from all areas of the United States in ridge plots. Flat plots were excluded from the validation because their slope gradients were much less than the lowest slope gradient in these experiments and some soil types were not represented in flat plots. The detailed information about the experimental materials and procedures were described [3]. Based on their data analysis techniques, the means of the last four erosion rates and flow discharges were selected as the erosion rate and flow discharge for a given plot in this validation. If there was an outlier value within the last four, then it was not considered, and the four most consistent of the last five values were used [3]. Although the fixed slope length was an obstacle to validating the

improved interrill erosion equation, these experimental data could be used to judge the quality of different interrill erosion equations.

The “intrinsic” interrill erodibility for a given soil is independent of runoff rate, rainfall intensity, infiltration, slope length, and gradient. If an interrill erosion equation adequately describes the relationship between interrill erosion rate and its influencing factors, the interrill erodibility, as estimated by an interrill erosion equation for a given soil, should change little over a wide range of conditions. Therefore, the CV of interrill erodibility estimated from an interrill erosion equation for a given soil under a wide range of conditions can be used to judge the quality of the interrill erosion equation. Interrill erodibility values, as estimated from the different interrill erosion equations discussed in this paper, along with their CV for 33 soils in the United States, are given in Table 6.

In general, there were common trends in the interrill erodibilities predicted by the various interrill erosion equations. For all soils, very strong positive correlations ( $p < 0.05$ ) were found between the interrill erodibility values predicted from the various interrill erosion equations. Although the trends showed that interrill erodibility values predicted from the different interrill erosion equations reflected the strength of soil resistance to interrill erosion, the precision of the predictions was different among the equations. The CV of interrill erodibility from Eq. (10) was less than that from Eq. (1) for 30 soils, that from Eq. (10) was less than that from Eq. (3) for 25 soils, and that from Eq. (10) was less than that from Eq. (4) for 29 soils. For 23 soils, the CV of interrill erosion from Eq. (10) was the lowest among those from the four equations. Figure 8 shows the observed and predicted values for the various equations. The correlation coefficients and Nash-Sutcliffe coefficients between the measured and predicted values for Eq. (10) were the highest among all the equations, which suggested that Eq. (10) described the relationship between interrill erosion rate and its influencing factors better than previously proposed interrill erosion equations, even though the slope length of the plots in the experiments used for validation was fixed.

The CV of interrill erodibility from Eqs. (3) and (10) was generally less than that from Eq. (1), indicating that rainfall intensity or flow discharge alone cannot completely express interrill erosion processes. Compared with Eq. (3), the reduced proportion of flow discharge in Eq. (4) resulted in an increase in the CV of interrill erodibility, but the reduced proportion of rainfall intensity in Eq. (10) resulted in a decrease in the CV of interrill erodibility. These results indicated that flow discharge is still the most important transport agent for interrill erosion processes, even though rainfall intensity has two effects, i.e., detachment of soil and enhancement of the transport capacity of thin overland flow. The previously proposed interrill erosion equations overemphasized the effect of rainfall intensity on interrill

erosion when slope length was relatively longer. The CVs of interrill erodibility from Eq. (3) and Eq. (10) were closer, perhaps because slope length was fixed in the WEPP cropland soil field interrill erodibility experiments.

## Conclusions

Previously proposed interrill erosion equations based on mini-plot experiments largely ignored the effect of slope length and plot size on interrill erosion rate. A series of simulated rainfall experiments was conducted to validate the previously proposed interrill erosion equations. The results indicated that slope gradient almost adequately predicted interrill erosion in the previously proposed equations, but that the interrill erodibilities calculated from previously proposed equations generally decreased with increasing slope length and rainfall intensity. This result suggested that adding a factor for slope length and adjusting the factor for rainfall intensity are necessary to improve prediction of interrill erosion rate. An improved interrill erosion equation,  $D_i = K_i R I^{0.22} S_f L^{-0.25}$ , was developed by analyzing the relationships between sediment concentration and rainfall intensity, slope length, and slope gradient. To evaluate the effectiveness of the improved interrill erosion equation, part experimental data from WEPP cropland soil field interrill erodibility experiments were used for validation. The results indicated that the improved interrill erosion equation predicted interrill erosion rate better than previously proposed interrill erosion equations, even though the slope length of the plots in the WEPP experiments was fixed.

## Author Contributions

Conceived and designed the experiments: ZW FZ MY. Performed the experiments: ZW FZ. Analyzed the data: FZ ZW MY. Contributed reagents/materials/analysis tools: ZW. Wrote the paper: FZ ZW MY.

## References

- Meyer LD, Foster GR, Romkens MJM (1975) Source of soil eroded by water from upland slopes. In: Present and prospective technology for predicting sediment yields and sources, Washington, USDA-Agricultural Research: 177–189.
- Kinnell PIA (1991) The effect of flow depth on sediment transport induced by raindrops impacting shallow flows. Transactions of the ASAE 34: 161–168.
- Elliot WJ, Liebenow AM, Laflen JM, Kohl KD (1989) A Compendium of Soil Erodibility Data from WEPP Cropland Soil Field Erodibility Experiments 1987 and 1988. NSERL Report No 3, The Ohio State University, and USDA Agricultural Research Service.
- Morgan RPC, Quinton JN, Smith RE, Govers G, Poesen JWA, et al. (1998) The European Soil Erosion Model (EUROSEM): a dynamic approach for predicting sediment transport from fields and small catchments. Earth Surf Proc Land 23: 527–544.
- De Roo APJ, Wesseling CG, Ritsema CJ (1996) LISEM: A single-event physically based hydrological and soil erosion model for drainage basins I: theory, input and output. Hydrol Process 10: 1107–1117.
- Nord G, Esteves M (2005) PSEM\_2D: A physically based model of erosion processes at the plot scale. Water Resour Res 41: W08407.
- Valmis S, Dimoyiannis D, Danalatos NG (2005) Assessing interrill erosion rate from soil aggregate instability index, rainfall intensity and slope angle on cultivated soils in central Greece. Soil Till Res 80: 139–147.
- Yan FL, Shi ZH, Li ZX, Cai CF (2008) Estimating interrill soil erosion from aggregate stability of Ultisols in subtropical China. Soil Till Res 100: 34–41.
- Ascough JC, Baffaut C, Nearing MA, Liu BY (1997) The WEPP watershed model: I. Hydrology and erosion. Transactions of the ASAE 40: 921–933.
- Wei H, Nearing MA, Stone JJ, Guertin DP, Spaeth KE, et al. (2009) A New Splash and Sheet Erosion Equation for Rangelands. Soil Sci Soc Am J 73: 1754–1754.
- Meyer LD (1981) How Rain Intensity Affects Interrill Erosion. Transactions of the ASAE 24: 1472–1475.
- Watson DA, Laflen JM (1986) Soil strength, slope, and rainfall intensity effects on interrill erosion. Transactions of the ASAE 29: 98–102.
- Foster GR, Meyer LD, Onstad CA (1977) An Erosion Equation Derived from Basic Erosion Principles. Transactions of the ASAE 20: 678–682.
- Meyer LD, Harmon WC (1984) Susceptibility of agricultural soils to interrill erosion. Soil Sci Soc Am J 48: 1152–1157.
- Guy BT, Dickinson WT, Rudra RP (1987) The Roles of Rainfall and Runoff in the sediment transport capacity of interrill flow. Transactions of the ASAE 30: 1378–1386.
- Elliot WJ, Laflen JM, Kohl KD (1989) Effect of soil properties on soil erodibility. Paper no 89-2150 Transactions of the ASAE, St. Joseph, MI.
- Mccool DK, Brown LC, Foster GR, Mutchler CK, Meyer LD (1987) Revised slope steepness factor for the universal soil loss equation. Transactions of the ASAE 30: 1387–1396.
- Neal JH (1938) The Effect of the Degree of Slope and Rainfall Characteristics on Runoff and Soil Erosion. Soil Sci Soc Am J 2: 525–532.
- Zhang XC, Nearing MA, Miller WP, Norton LD, West LT (1998) Modelling interrill sediment delivery. Soil Sci Soc Am J 62: 438–444.
- Young RA, Wiersma JL (1973) The role of rainfall impact in soil detachment and transport. Water Resour Res 9: 1629–1636.
- Truman CC, Bradford JM (1995) LABORATORY DETERMINATION OF INTERRILL SOIL ERODIBILITY. Soil Sci Soc Am J 59: 519–526.
- Kinnell PIA (1993) Runoff as factor influencing experimentally determined interrill erodibilities. Aust J Soil Res 31: 333–342.
- Flanagan DC, Nearing MA (1995) USDA-Water Erosion Prediction Project: Technical documentation. NSERL Rep no 10 Natl Soil Erosion Res Lab, West Lafayette, IN.
- Monke EJ, Marelli HJ, Meyer LD, DeJong JF (1977) Runoff, erosion and nutrient movement from interrill areas. Transactions of the ASAE 20: 58–61.
- Gilley JE, Woolhiser DA, McWhorter DB (1985) Interrill soil erosion - Part II: Testing and use of model equations. Transactions of the ASAE 28: 154–159.
- Gilley JE, Woolhiser DA, McWhorter DB (1985) Interrill soil erosion-Part I. Development of model equations. Transactions of the ASAE 28: 147–153, 159.
- Meyer LD, Harmon WC (1989) How Row-Sideslope Length and Steepness Affect sideslope erosion. Transactions of the ASAE 32: 639–644.
- Kinnell PIA (2000) The effect of slope length on sediment concentrations associated with side-slope erosion. Soil Sci Soc Am J 64: 1004–1008.
- Chaplot VAM, Le Bissonnais Y (2003) Runoff features for interrill erosion at different rainfall intensities, slope lengths, and gradients in an agricultural loessial hillslope. Soil Sci Soc Am J 67: 844–851.

30. Gabriels D (1999) The effect of slope length on the amount and size distribution of eroded silt loam soils: short slope laboratory experiments on interrill erosion. *Geomorphology* 28: 169–172.
31. Foster GR (1982) Modeling the erosion process. In *Hydrologic modeling of small watersheds* C T Haan et al, eds Chapter 8: 297–380. ASAE Monograph No. 5, St. Joseph, MI: ASAE.
32. Renard K, Foster GR, Weesies G, McCool DK, Yoder D (1997) *Predicting Soil Erosion by Water; Guide to Conservation Planning with the Revised Universal Soil Loss Equation (RUSLE)*. ARS, USDA, Agricultural Handbook No 703.
33. Kinnell PIA (1993) Sediment concentrations resulting flow depth drop size interactions in shallow overland flow. *Transactions of the ASAE* 36: 1099–1103.
34. Kinnell P (1994) The effect of pre-detached particles on soil erodibilities associated with erosion by rain-impacted flows. *Soil Res* 32: 127–142.
35. Wischmeier WH (1958) Rainfall energy and its relationship to soil loss. *Trans AGU* 39: 285–291.
